# Supplementary material
Source: PubMed Central journal article supplement (PMC4571002)
Supplement: mmc1.pdf [file mmc1.pdf]

The American Journal of Human Genetics

Supplemental Data

## **Loss-of-Function Mutations**

### **in *APPL1* in Familial Diabetes Mellitus**

**Sabrina Prudente, Prapaporn Jungtrakoon, Antonella Marucci, Ornella Ludovico, Patinut Buranasupkajorn, Tommaso Mazza, Timothy Hastings, Teresa Milano, Eleonora Morini, Luana Mercuri, Diego Bailetti, Christine Mendonca, Federica Alberico, Giorgio Basile, Marta Romani, Elide Miccinilli, Antonio Pizzuti, Massimo Carella, Fabrizio Barbetti, Stefano Pascarella, Piero Marchetti, Vincenzo Trischitta, Rosa Di Paola, and Alessandro Doria**

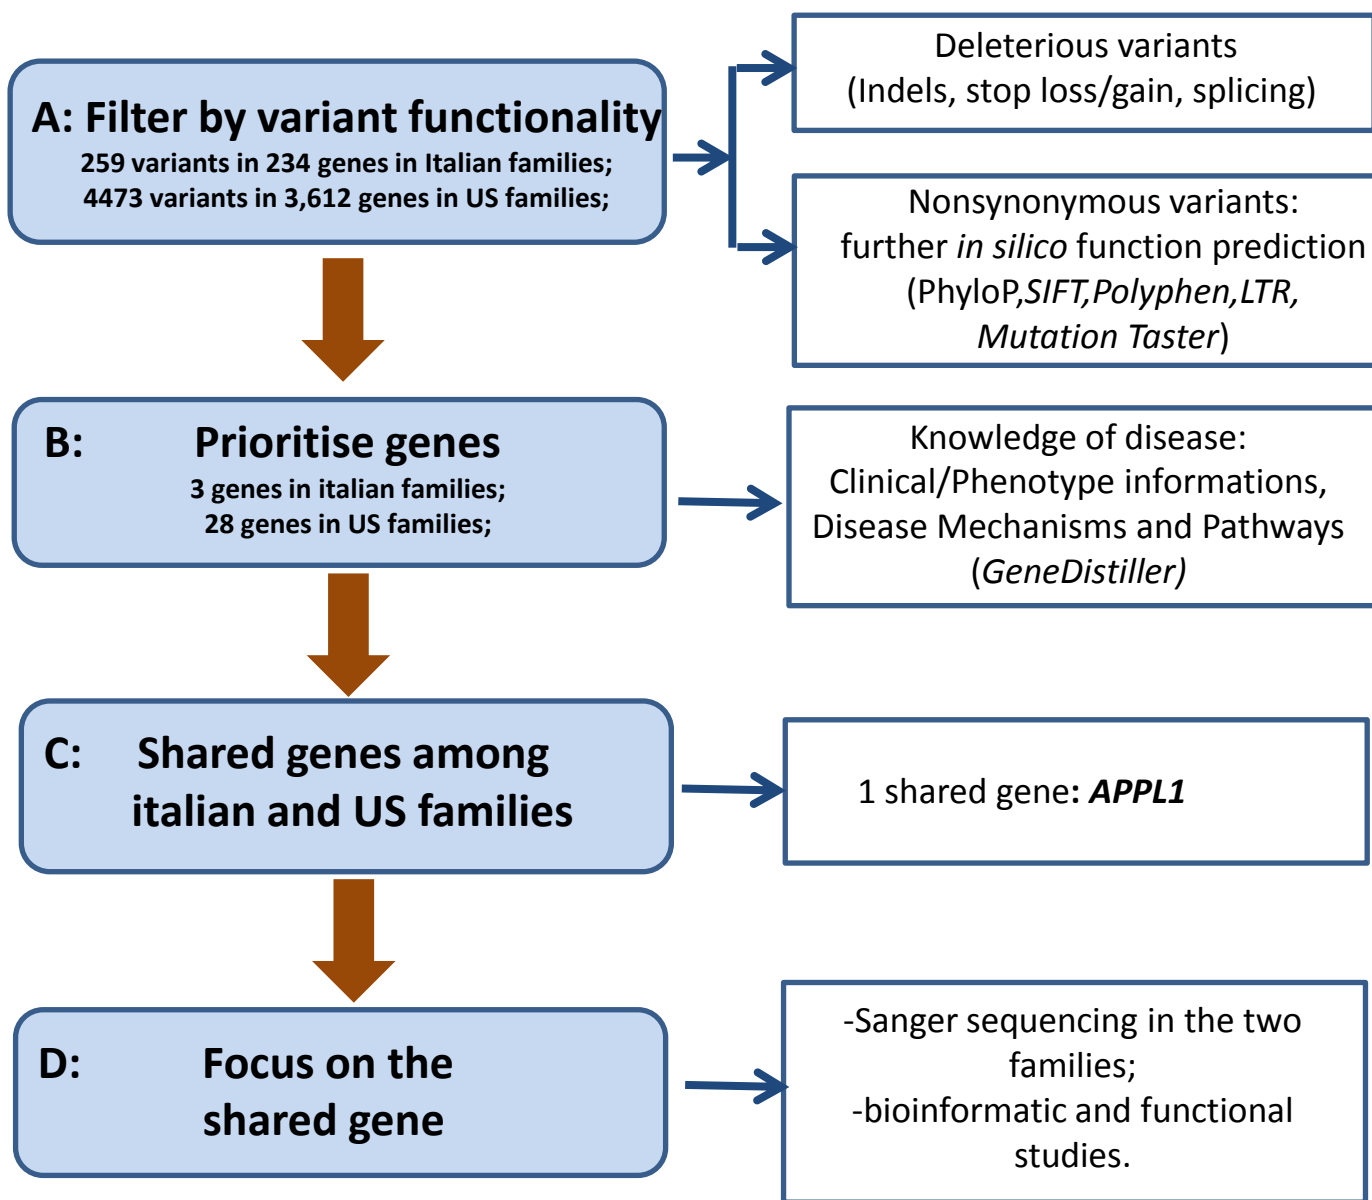

**Figure S1. Strategy to filter and prioritize candidate variants in the Italian and US families.**

Candidate variants were stratified through a mixed filtering/prioritization strategy taking into account the predicted impact of each variant and the functional relevance of individual genes with regard to the disease of interest (i.e. diabetes mellitus). In Step A, variants were filtered by functionality and only changes in residues conserved among species (as evaluated by PhyloP) or predicted to be deleterious by at least of one of four different prediction algorithms (i.e., SIFT, PolyPhen2, LRT and MutationTaster) or “inapplicable” by any predictors were retained. Variants identified in Step A were prioritized in Step B on the basis of the functional relevance of the genes in which they occurred using “GeneDistiller” (Seelow D et al., PLoS ONE 2008; 3:e3874). Genes were ranked based on combinations of terms based on knowledge of disease (including clinical and phenotype information, disease mechanisms and pathways) including non-insulin dependent diabetes mellitus (NIDDM) maturity onset diabetes of the young (MODY), permanent neonatal diabetes mellitus (PNDM), insulin, glucose, pancreas and islets as keywords in the OMIM entries, and using similarity of expression patterns, protein-protein interactions, and specific tissues expression (i.e. liver, pancreatic islets, adipocytes and skeletal muscle) as major weights. By using these filtering criteria, 4 variants in 3 genes and 35 variants in 28 genes were prioritized in the Italian and the US sets, respectively. We focused the present study on the only gene (*APPL1*) that was shared by the two prioritization lists.

**A** Individuals from Italian family

**B** Individuals from US family

Wild type

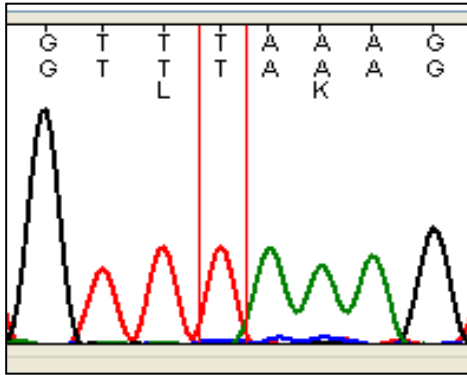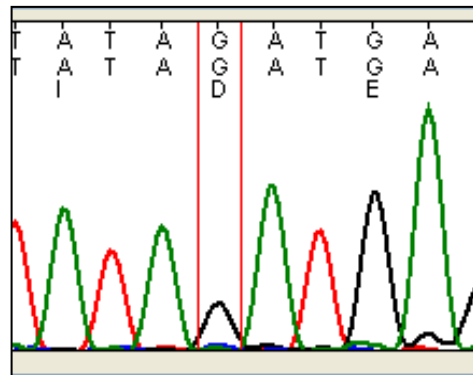

Wild type

Mutated

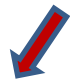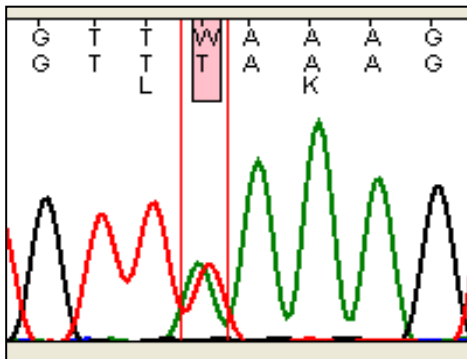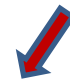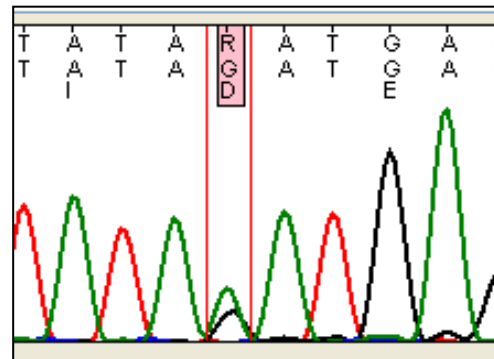

Mutated

**Figure S2. Electropherograms of the *APPL1* mutations identified in two families.**

The panel A shows the heterozygous non-sense mutation c.1655T>A: p.Leu552\* (marked with an arrow) in exon 17 found in the Italian family.

The panel B shows the heterozygous missense mutation c.280G>A: p.Asp94Asn (marked with an arrow) in exon 4 found in the family from US.

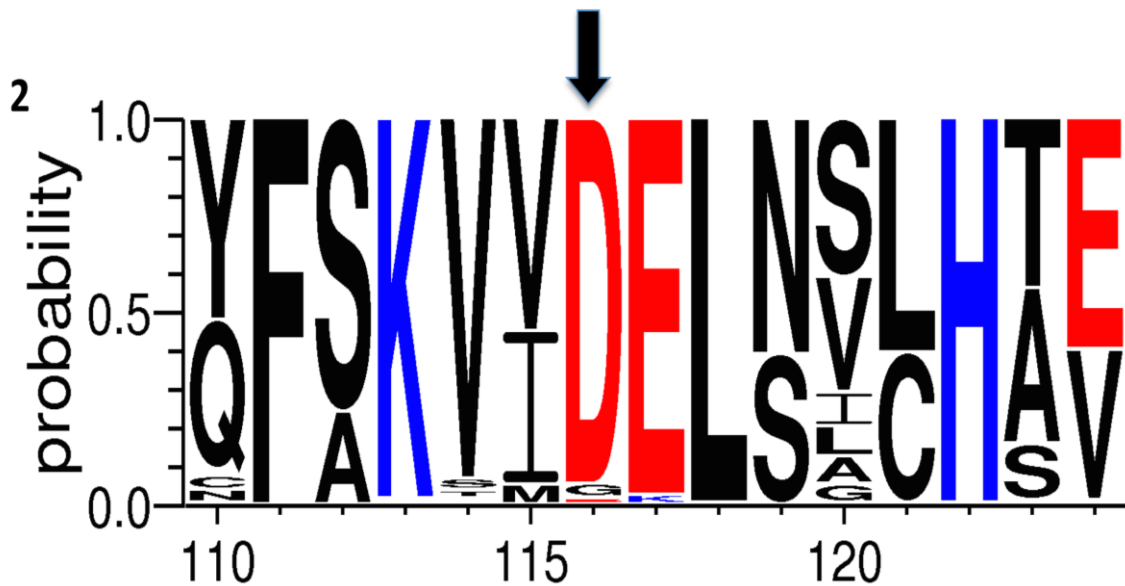

**Figure S3. Aminoacid conservation in the APPL1 region encompassing Asp94**

Multiple-sequence alignment of the APPL1 BAR domain from 244 homologous sequences was performed with the Clustal Omega sequence-alignment tool. Logo was calculated by means of the WebLogo service. The height of each amino acid one-letter code is proportional to the observed frequency of the residue at that position.

Numbering refers to the alignment.

Asp94 (indicated by the black arrow) appears to be highly conserved.

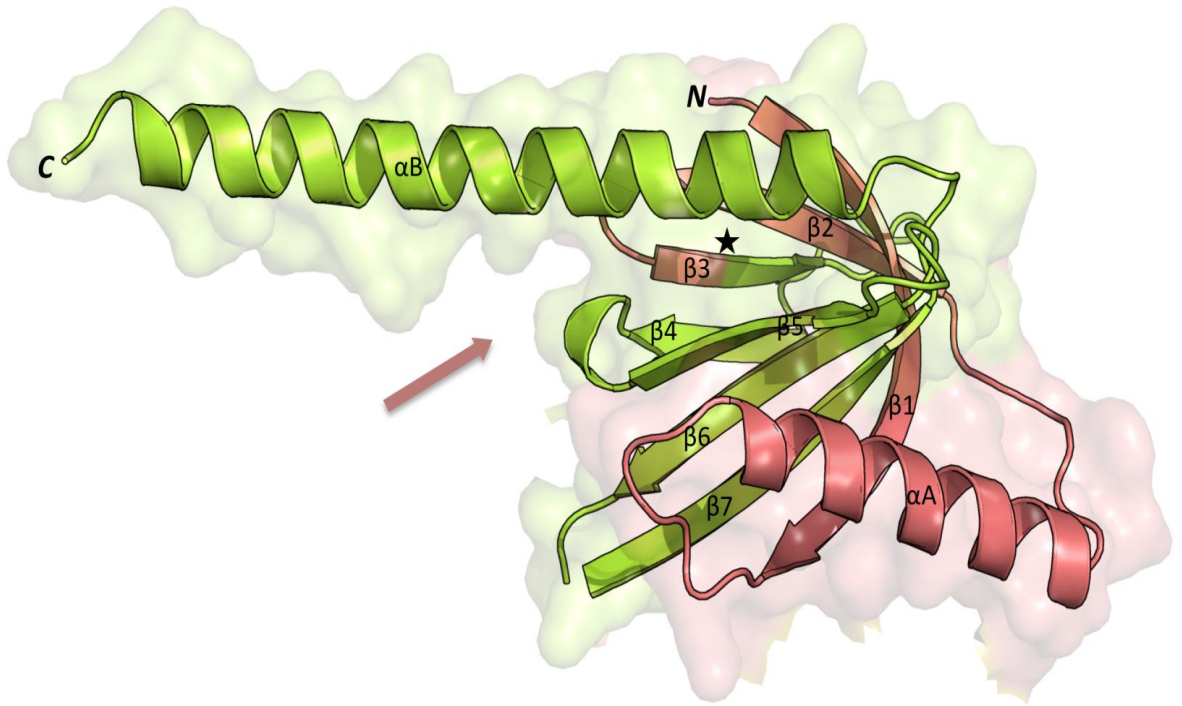

**Figure S4. Structure of the PTB domain of human APPL1.**

Phosphotyrosine binding domain (PTB) of human APPL1 (Protein Data Bank ID: 2ELA) is represented. The star denotes the position of Leu552 in the third  $\beta$ -sheet of PTB domain: the premature stop codon results in a deletion of the protein structure shown in green, while the region before the mutation is coloured in magenta. The arrow indicates the peptide-binding site (between  $\beta$ 5 sheet and C-terminal helix) in most of the proteins containing PTB domain.

**Table S1. Summary of whole-exome sequencing (WES) performance in US and Italian families**

|                                          | Variants (N)              |                       |
|------------------------------------------|---------------------------|-----------------------|
|                                          | Italian families<br>(n=8) | US families<br>(n=52) |
| Individuals subjected to WES             | 24                        | 104                   |
| All variants                             | 250,174                   | 453,415               |
| Passing primary QC filters               | 158,695                   | 365,984               |
| Heterozygous                             | 92,043                    | 214,118               |
| Novel, infrequent or rare (MAF <0.01)    | 14,726                    | 133,742               |
| Shared by two affected members           | 3,109                     | 30,107                |
| Nonsense, frameshift, missense, splicing | 644                       | 7,972                 |

**Table S2. Candidate disease genes obtained after prioritization in both the Italian and US families**

| Italian Families |         |                              | US Families    |         |                              |
|------------------|---------|------------------------------|----------------|---------|------------------------------|
| Gene             | Gene ID | Gene Distiller Overall Score | Gene           | Gene ID | Gene Distiller Overall Score |
| <b>APPL1</b>     | 26060   | 5898                         | <i>GCG</i>     | 2641    | 68431                        |
| <i>CPT1A</i>     | 1374    | 5548                         | <i>ADIPOQ</i>  | 9370    | 31117                        |
| <i>TRIB3</i>     | 57761   | 271                          | <i>MAPK3</i>   | 5595    | 26747                        |
|                  |         |                              | <i>SREBF1</i>  | 6720    | 26410                        |
|                  |         |                              | <i>GLP1R</i>   | 2740    | 24728                        |
|                  |         |                              | <i>PTPN1</i>   | 5770    | 20433                        |
|                  |         |                              | <i>G6PC2</i>   | 57818   | 20359                        |
|                  |         |                              | <i>PTPN11</i>  | 5781    | 19198                        |
|                  |         |                              | <i>AKT2</i>    | 208     | 16489                        |
|                  |         |                              | <i>FOXA1</i>   | 3169    | 12469                        |
|                  |         |                              | <i>STXBP4</i>  | 252983  | 11239                        |
|                  |         |                              | <i>PRKAA2</i>  | 5663    | 8656                         |
|                  |         |                              | <i>TSC2</i>    | 7241    | 7312                         |
|                  |         |                              | <i>ITPR3</i>   | 3710    | 7277                         |
|                  |         |                              | <i>SORBS1</i>  | 10580   | 6141                         |
|                  |         |                              | <b>APPL1</b>   | 26060   | 5848                         |
|                  |         |                              | <i>MET</i>     | 4233    | 4107                         |
|                  |         |                              | <i>RAPGEF4</i> | 11069   | 3845                         |
|                  |         |                              | <i>KL</i>      | 9365    | 3362                         |
|                  |         |                              | <i>ANKRD26</i> | 22852   | 3063                         |
|                  |         |                              | <i>PRKAR1B</i> | 5575    | 2460                         |
|                  |         |                              | <i>PRKAG3</i>  | 53632   | 2320                         |
|                  |         |                              | <i>MTOR</i>    | 2474    | 236                          |
|                  |         |                              | <i>ADRA2</i>   | 150     | 98                           |
|                  |         |                              | <i>WFS1</i>    | 7466    | 89                           |
|                  |         |                              | <i>CACNAE1</i> | 777     | 41                           |
|                  |         |                              | <i>RFX6</i>    | 222546  | 22                           |
|                  |         |                              | <i>ASPSCR1</i> | 79058   | 21                           |

Genes prioritization has been carried out by «GeneDistiller» <http://www.genedistiller.org>

**Table S3. Average clinical features of examined members from Italian and US families according to their genetic and glycemc status.**

| <b>Family</b>  | <b>Status</b>                        | <b>Gender (M/F)</b> | <b>Age</b> | <b>Age at diagnosis</b> | <b>BMI</b> | <b>FPG</b> |
|----------------|--------------------------------------|---------------------|------------|-------------------------|------------|------------|
| <i>Italian</i> | Non affected subjects (non carriers) | 1/7                 | 38.5±8.9   | -                       | 26.2±4.4   | 85.6±8.9   |
|                | Non affected subjects (carriers)     | 5/5                 | 32.8±7.6   | -                       | 28.2±4.6   | 81.1±8.8   |
|                | Affected subjects (carriers)         | 4/6                 | 47.9±10.9  | 37.6±10.1               | 28.3±2.5   | -          |
| <i>US</i>      | Non affected subjects (non carriers) | 3/3                 | 42.5±20.2  | -                       | 28.8±7.6   | 84.7±11.8  |
|                | Non affected subjects (carriers)     | 1                   | 48.0       | -                       | 28.0       | 72.0       |
|                | Affected subjects* (carriers)        | 3/0                 | 54.0±13.2  | 37.33±9.2               | 27.9±2.6   | -          |

BMI: body mass index; FPG: fasting plasma glucose;

\*this group comprises neither the patient with type 1 diabetes nor the one with type 2 diabetes who does not carry mutation.



**Table S4. Primers and PCR conditions used for *APPL1* gene (NC\_000003.12 57227737..57273471) resequencing**

| Primer Name     | Primer sequence            | Length | Ta | Product Size |
|-----------------|----------------------------|--------|----|--------------|
| APPL1-Ex1-F     | ACGGTCCCCTGCGATTTAG        | 19     | 59 | 590          |
| APPL1-Ex1-R     | CCCAGCCTCCACAACCTCC        | 18     |    |              |
| APPL1-Ex2-F     | TTGGAAAATACCTCTGCTTTG      | 21     | 53 | 531          |
| APPL1-Ex2-R     | ATGCTTCAATCGTCTATCACTTT    | 23     |    |              |
| APPL1-Ex3-F     | GGCAATAATCAGTCATCAACG      | 21     | 53 | 645          |
| APPL1-Ex3-R     | GCTCCAGTTCCTCCAATAACAC     | 22     |    |              |
| APPL1-Ex4-F     | GCTGTGACTTGCTGAACATTAC     | 22     | 53 | 632          |
| APPL1-Ex4-R     | TCTTCTCTCCCTGCCTACATC      | 21     |    |              |
| APPL1-Ex5-F     | TGTTCCCTTGCTTTTAGTGCA      | 23     | 53 | 474          |
| APPL1-Ex5-R     | TCCTATAAATGTTTGTAAGTGAAGC  | 25     |    |              |
| APPL1-Ex6-F     | CAGAGTAGCTTTTTCACCCTGA     | 22     | 63 | 579          |
| APPL1-Ex6-R     | GGGCAGCAGGATCACTACA        | 19     |    |              |
| APPL1-Ex7-F     | TTCAAGCCACAATCATAGCATACT   | 23     | 53 | 702          |
| APPL1-Ex7-R     | TCAAAATACAAAGCAACAAAAGG    | 23     |    |              |
| APPL1-Ex8-F     | TTCTAAAAGATCAGAAAACAGGAACA | 26     | 53 | 496          |
| APPL1-Ex8-R     | TGCAAGGAAAACCATTCTTC       | 20     |    |              |
| APPL1-Ex9-F     | TCCTTAATGGCTCCCTGTGCAGT    | 23     | 53 | 495          |
| APPL1-Ex9-R     | TCCCATCAAACCTCCACAATTTCA   | 24     |    |              |
| APPL1-Ex10-F    | CCCATGCCGCTCTTCCTCTC       | 20     | 68 | 524          |
| APPL1-Ex10-R    | ATGCCCAGCCCTGGTTTCAC       | 20     |    |              |
| APPL1-Ex11-F    | ATTTCCAGCCTTGTTTTGG        | 19     | 53 | 671          |
| APPL1-Ex11-R    | AGGATTTTCAGTTCAGTTCC       | 21     |    |              |
| APPL1-Ex12-F    | TGAGGATCAGCACCTGTTCCCTT    | 23     | 53 | 572          |
| APPL1-Ex12-R    | CAGCCTGCCAGACAGCAACA       | 20     |    |              |
| APPL1-Ex13-F    | TGCAGTTGAGTATTGAACATTTGCCT | 20     | 64 | 534          |
| APPL1-Ex13-R    | TCATGGCACATTAAGCTACTCATTCA | 20     |    |              |
| APPL1-Ex14-15-F | CAACACTTGCAGGGAATTTT       | 20     | 53 | 811          |
| APPL1-Ex14-15-R | GAAATGCAGACAGGGGATTA       | 20     |    |              |
| APPL1-Ex16-F    | AGGATGGGGCATTTTAGAGC       | 20     | 63 | 560          |
| APPL1-Ex16-R    | CACACAAACACACAACAACCTGG    | 22     |    |              |
| APPL1-Ex17-18-F | GAAAACCTAAAAGGAGGCAGTG     | 22     | 53 | 554          |
| APPL1-Ex17-18-R | CAGCCAAAGACCAATCATAGC      | 21     |    |              |
| APPL1-Ex19-F    | TTCAACAACCTTTTCTGCTTG      | 22     | 53 | 558          |
| APPL1-Ex19-R    | TTGGATGATGGACACCTAAA       | 21     |    |              |
| APPL1-Ex20-F    | AGGTGAGAGTCAGCAGTGGA       | 21     | 64 | 479          |
| APPL1-Ex20-R    | CAAGTCATTCTCGTGCCTCA       | 20     |    |              |
| APPL1-Ex21-F    | GATGCTTGATTTTCCAAGAATG     | 22     | 53 | 500          |
| APPL1-Ex21-R    | TCTGTTTATGAAGTGGCTGAAC     | 22     |    |              |
| APPL1-Ex22-F    | TGGTGTGATTGTTTGGGTGT       | 22     | 53 | 583          |
| APPL1-Ex22-R    | GAGCAAATGTAATTCCTCAGCA     | 22     |    |              |

**Table S5. Software prediction algorithms used to assess the Asp94Asn mutation effect on APPL1 protein**

| Software prediction algorithm | Score                                                                     | Effect predicted                                                   |
|-------------------------------|---------------------------------------------------------------------------|--------------------------------------------------------------------|
| <b><i>Sequence based</i></b>  |                                                                           |                                                                    |
| SIFT                          | 0.37(cutoff = 0.05)                                                       | Neutral                                                            |
| Polyphen-2                    | 0.61(scale 0 to 1)                                                        | Possibly damaging                                                  |
| Panther                       | 0.66 (scale 0 to 1)                                                       | Deleterious                                                        |
| <b><i>Structure based</i></b> |                                                                           |                                                                    |
| CUPSAT                        | $\Delta\Delta G = -0.22$ kcal/mol                                         | Overall stability = Destabilising<br>Torsion angles = Unfavourable |
| I-Mutant 2.0                  | $\Delta\Delta G = -1.30$ kcal/mol                                         | Decrease stability                                                 |
| MUPRO                         | Confidence score = -0.96<br>(scale -1 to 1, -1 = max. decrease stability) | Decrease stability                                                 |

**Table S6. APPL1 mRNA expression levels in transfected HepG2 cells.**

|                          | APPL1 expression levels<br>( $2^{-\Delta\Delta CT} \pm sd$ ) |
|--------------------------|--------------------------------------------------------------|
| <b>HepG2 EV</b>          | 1                                                            |
| <b>HepG2 APPL1</b>       | 1048 $\pm$ 173                                               |
| <b>HepG2 APPL1_X552</b>  | 1003 $\pm$ 108                                               |
| <b>HepG2 APPL1_ASN94</b> | 1135 $\pm$ 144                                               |

HepG2 EV: HepG2 cells transiently transfected with control empty vector.

HepG2 APPL1: HepG2 cells transiently transfected with pCMV6-Entry APPL1 myc tagged cDNA.

HepG2 APPL1\_X552: HepG2 cells transiently transfected with APPL1 cDNA carrying X552 mutation.

HepG2 APPL1\_ASN94: HepG2 cells transiently transfected with APPL1 cDNA carrying ASN94 mutation.

RNA was isolated by using RNeasy Mini kit (Qiagen S.r.l., Milan, Italy), cDNA generated by reverse transcription with iScript Reverse Transcription (Biorad, Hercules, CA) according to the manufacturer's instructions and used as template in the subsequent analyses. Prime Time Std qPCR Assays (IDT, Iowa USA) were used to quantify relative gene expression levels of APPL1, GAPDH, B actin and 18S on ABI-PRISM 7900 (Applied Biosystems, Carlsbad, CA). Expression levels of APPL1 across different experimental conditions were calculated by using the comparative  $\Delta CT$  method. Briefly, the amount of APPL1 was normalized to the geometric mean of GAPDH, B actin and 18S expression and related to APPL1 expression in HepG2 EV control cells ( $2^{-\Delta\Delta CT}$ ). Data are presented as  $2^{-\Delta\Delta CT} \pm sd$ .
